# Supplementary material
Source: PubMed Central journal article supplement (PMC6239963)
Supplement: NIHMS970104-supplement-1.pdf [file NIHMS970104-supplement-1.pdf]

# Supplementary Figure S1

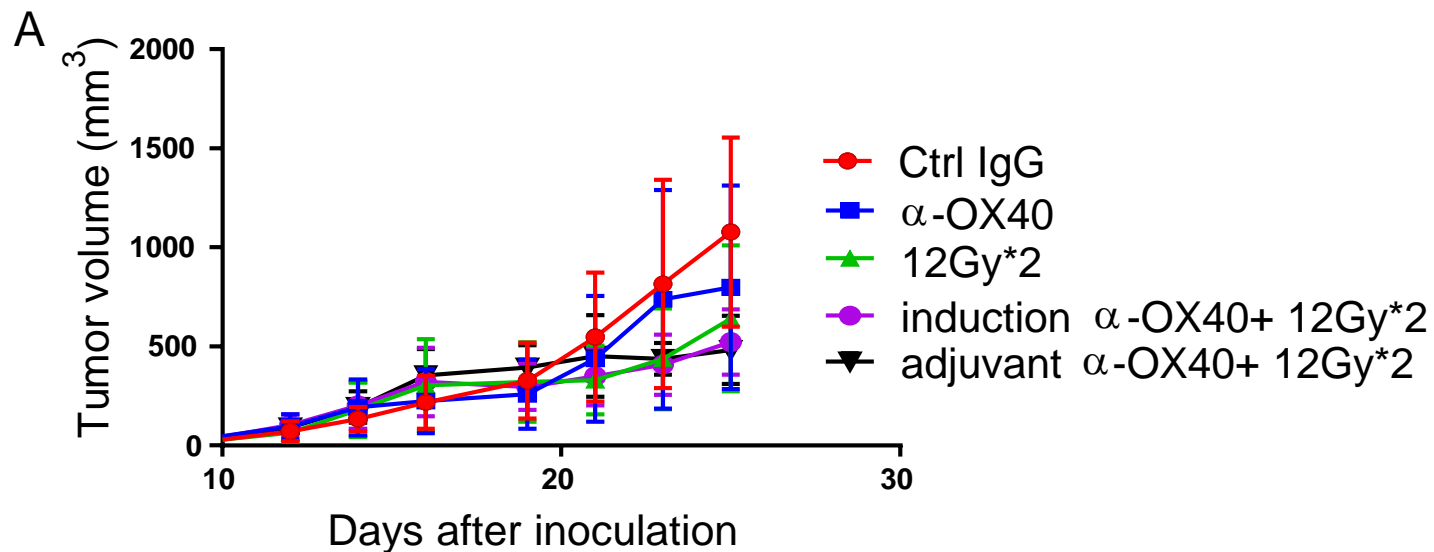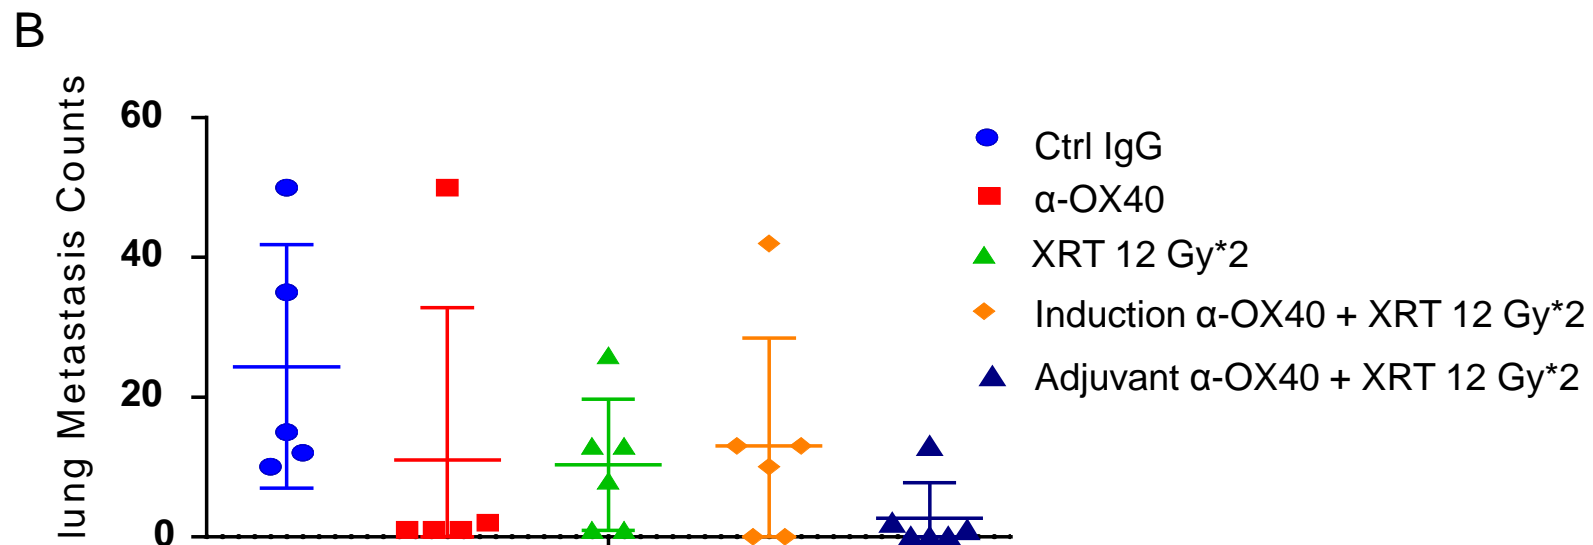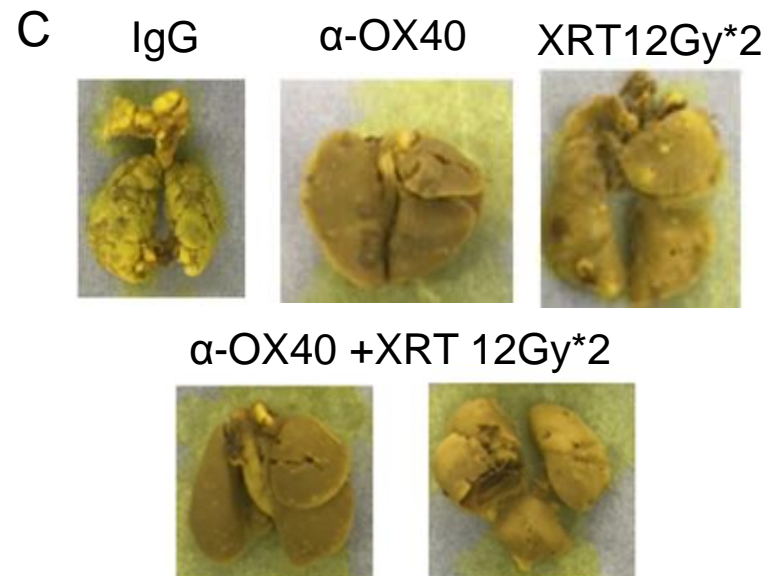

**Supplementary Figure S1.** XRT (12 Gy x 2) with α-OX40 treatment effect on **A**, tumor growth and **B**, lung metastases in induction and adjuvant settings. **C**, a representative picture depicting the decrease in lung tumor nodules with the combination therapy after staining with Bouin's fixative solution.

## Supplementary Figure S2

A

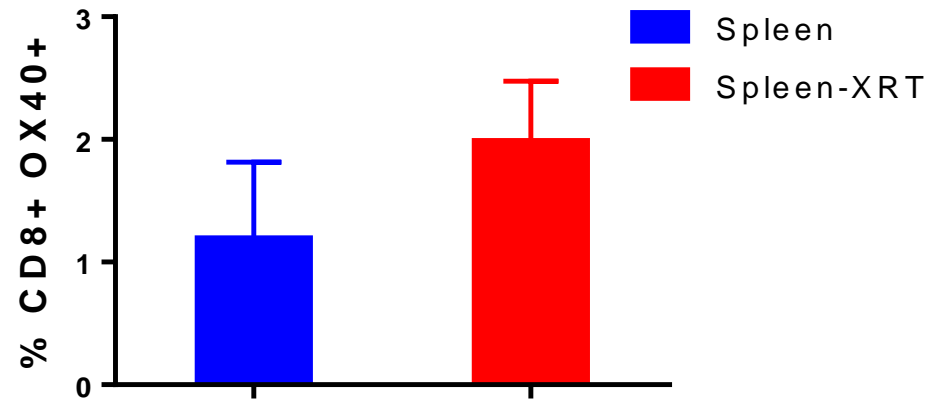

B

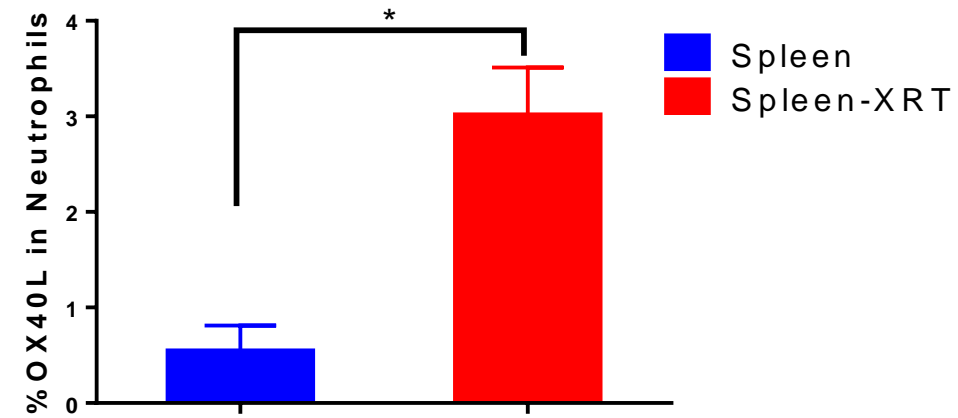

**Supplementary Figure S2.** XRT upregulates OX40<sup>+</sup> CD8 T-cells and enhances OX40L expression in neutrophils. **A**, in anti-PD1-resistant 344SQ tumor model, XRT given as three 12-Gy fractions (total dose 36 Gy) increased the percentages of CD8<sup>+</sup> T-cells expressing OX40 in the splenocytes 48 h after last dose of radiation. **B**, Percent neutrophils expressing OX40L isolated from splenocytes 48 h after XRT. Cells are first gated on leukocytes then Gr1<sup>hi</sup> CD11b<sup>+</sup> cells then on OX40L<sup>+</sup> population. \* $P \leq 0.05$  is considered significant.

# Supplementary Figure S3

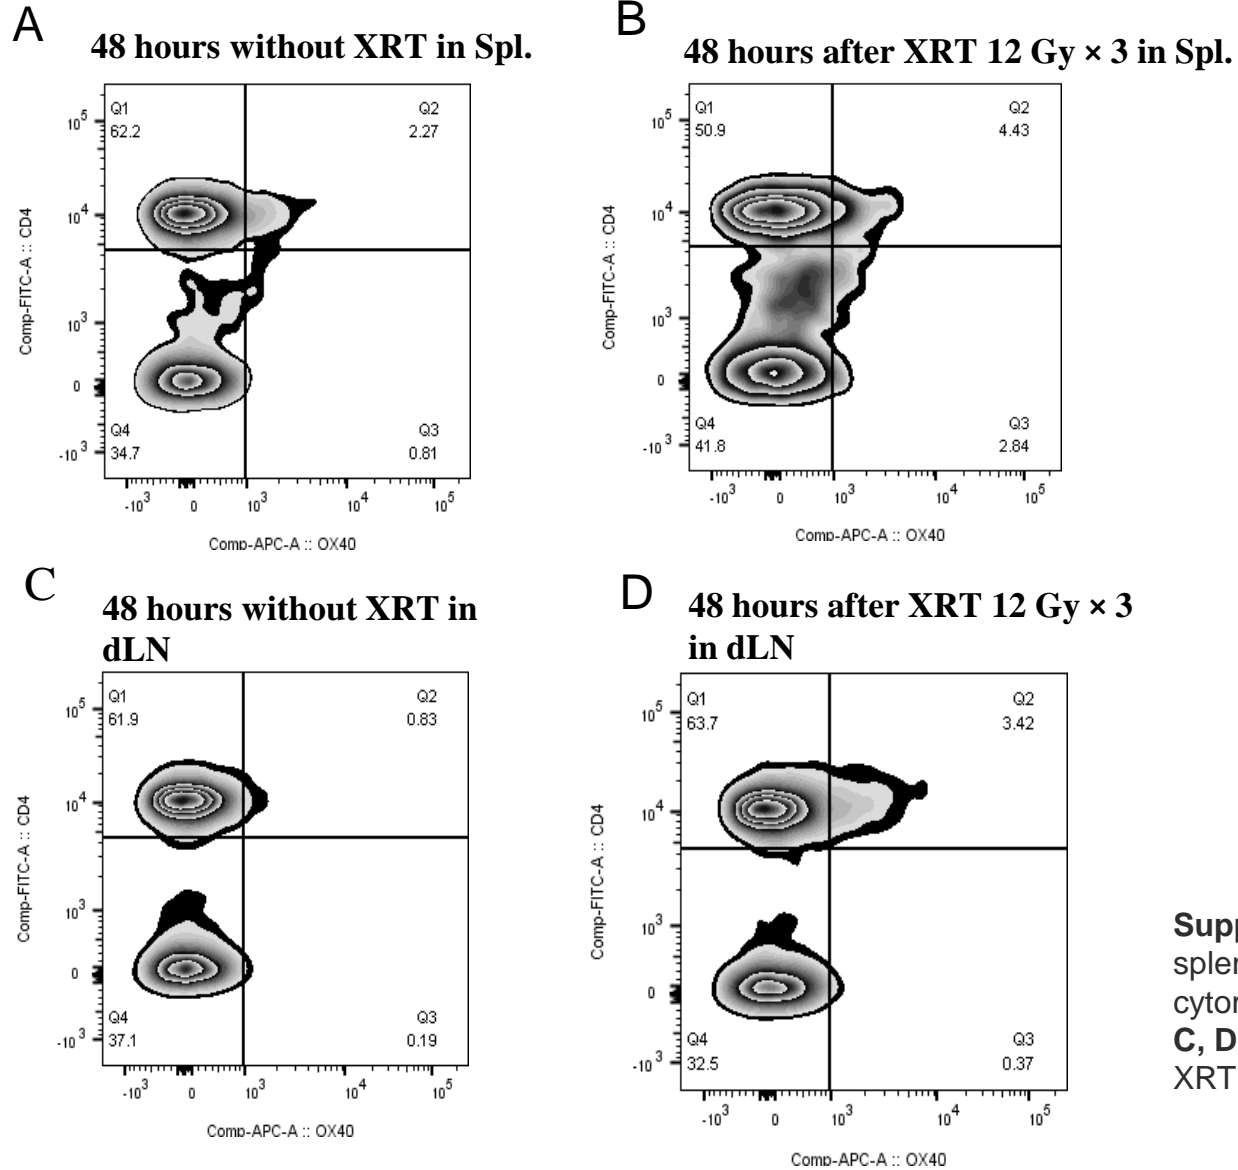

**Supplementary Figure S3.** Effect of radiation (XRT) on immune-cell profiles in splenocytes (Spl) and draining lymph nodes (dLN). Representative flow cytometry gating of (CD4<sup>+</sup> OX40<sup>+</sup>) lymphocytes isolated from **A, B** spleen and **C, D** tumor draining lymph node of mice at 48 h after XRT (12 Gy  $\times$  3) or no XRT to anti-PD1 resistant tumors.
